# Supplementary material
Source: publisher site journal article supplement (https://www.spandidos-publications.com/4686/downloadSupplementary)

Figure S1. Summary of the present study.

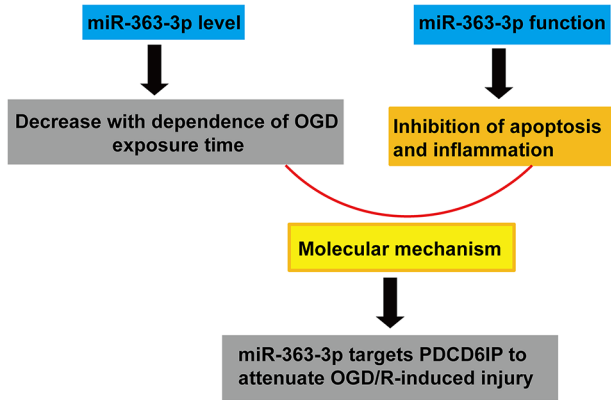

Supplement: Supplementary file 1 [file downloadSupplementary]
